# Supplementary material for: Extract of Monascus purpureus CWT715 Fermented from Sorghum Liquor Biowaste Inhibits Migration and Invasion of SK-Hep-1 Human Hepatocarcinoma Cells
Source: Molecules. 2016 Dec 8;21(12):1691. doi: 10.3390/molecules21121691 (PMC6272986; doi:10.3390/molecules21121691)
Supplement: Supplementary file 1 [file molecules-21-01691-s001.pdf]

## Supplementary Materials: Extract of *Monascus purpureus* CWT715 Fermented from Sorghum Liquor Biowaste Inhibits Migration and Invasion of SK-Hep-1 Human Hepatocarcinoma Cells

Wen-Teish Chang, Cheng-Hung Chuang, Wan-Ju Lee and Chin-Shiu Huang

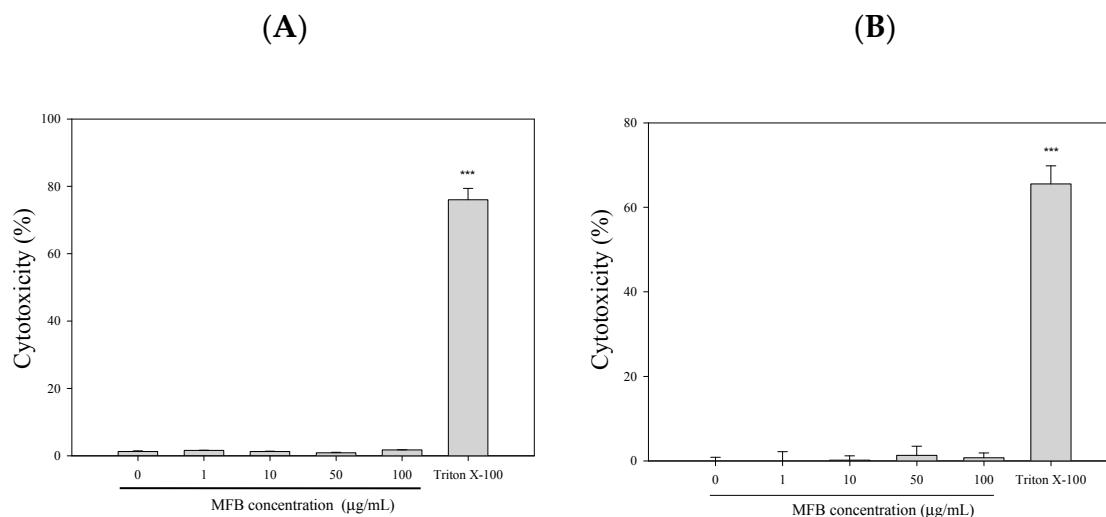

**Figure S1.** Effects of MFB on the release of LDH in SK-Hep-1 cells. Cells ( $1 \times 10^4$ ) were incubated with different concentration (1–100  $\mu\text{g/mL}$ ) of MFB for 24 h. MFB obtained from 6-day fermentation (A) and from 7-day fermentation (B) were measured the cytotoxicity. Values are means  $\pm$  SD,  $n = 3$ ; significant difference from control value was indicated \*\*\*  $p \leq 0.001$ .
